# Supplementary material
Source: MDPI journal article supplement (https://www.mdpi.com/2073-4344/14/1/10)
Supplement: s1 [file s1 › catalysts-2775417-supplementary.pdf]

Supporting information

**Enhanced Low-Temperature Activity and Hydrothermal Stability of Ce-Mn  
Oxide-Modified Cu-SSZ-39 Catalysts for NH<sub>3</sub>-SCR of NO<sub>x</sub>**

Ahui Tang<sup>1</sup>, Fuzhen Yang<sup>1</sup>, Ying Xin<sup>1,\*</sup>, Xiaoli Zhu<sup>1</sup>, Long Yu<sup>1</sup>, Shuai Liu<sup>1</sup>, Dongxu  
Han<sup>1</sup>, Junxiu Jia<sup>1</sup>, Yaning Lu<sup>1</sup>, Zhenguo Li<sup>2</sup>, Zhaoliang Zhang<sup>1</sup>

<sup>1</sup>School of Chemistry and Chemical Engineering, Shandong Provincial Key Laboratory  
of Fluorine Chemistry and Chemical Materials, University of Jinan, Jinan 250022,  
China

<sup>2</sup>National Engineering Laboratory for Mobile Source Emission Control Technology,  
China Automotive Technology & Research Center Co., Ltd., Tianjin 300300, China

Corresponding authors:

Ying Xin: [chm\\_xiny@ujn.edu.cn](mailto:chm_xiny@ujn.edu.cn); Tel.: +86-531-89736032

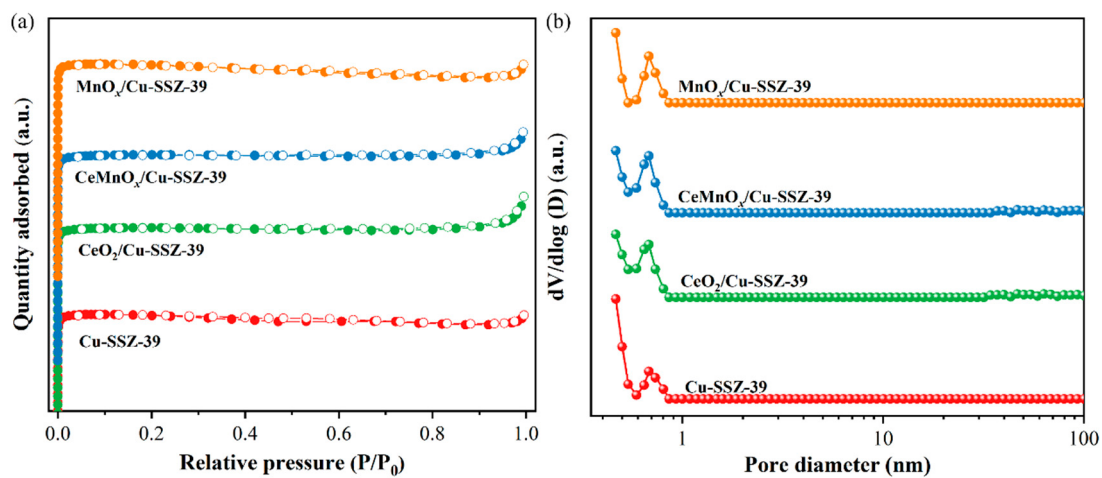

**Figure S1.**  $\text{N}_2$  adsorption/desorption isotherms (a) and pore size distribution curves (b) of  $\text{Cu-SSZ-39}$ ,  $\text{CeO}_2/\text{Cu-SSZ-39}$ ,  $\text{CeMnO}_x/\text{Cu-SSZ-39}$ , and  $\text{MnO}_x/\text{Cu-SSZ-39}$  catalysts.

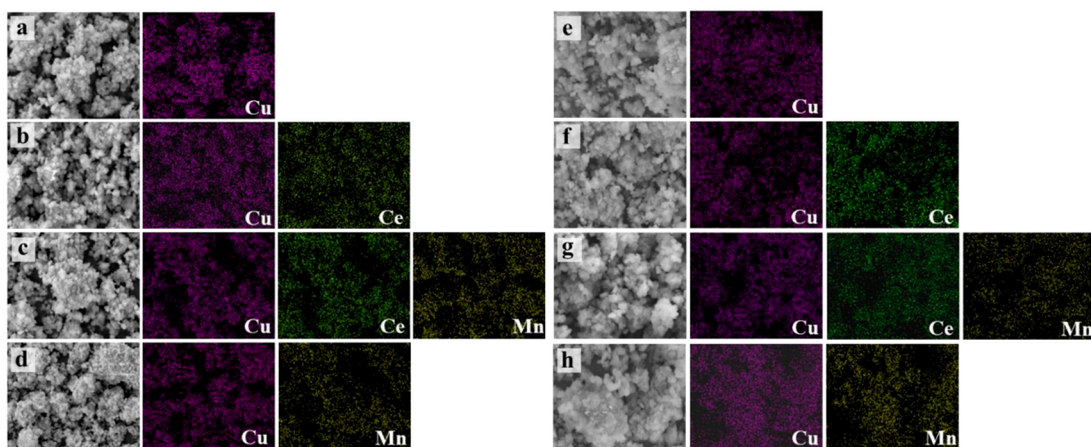

**Figure S2.** SEM images and Cu, Ce, Mn element EDS mappings of  $\text{Cu-SSZ-39}$  (a,e),  $\text{CeO}_2/\text{Cu-SSZ-39}$  (b,f),  $\text{CeMnO}_x/\text{Cu-SSZ-39}$  (c,g), and  $\text{MnO}_x/\text{Cu-SSZ-39}$  (d,h) catalysts: (a–d) fresh and (e–h) hydrothermally aged samples.

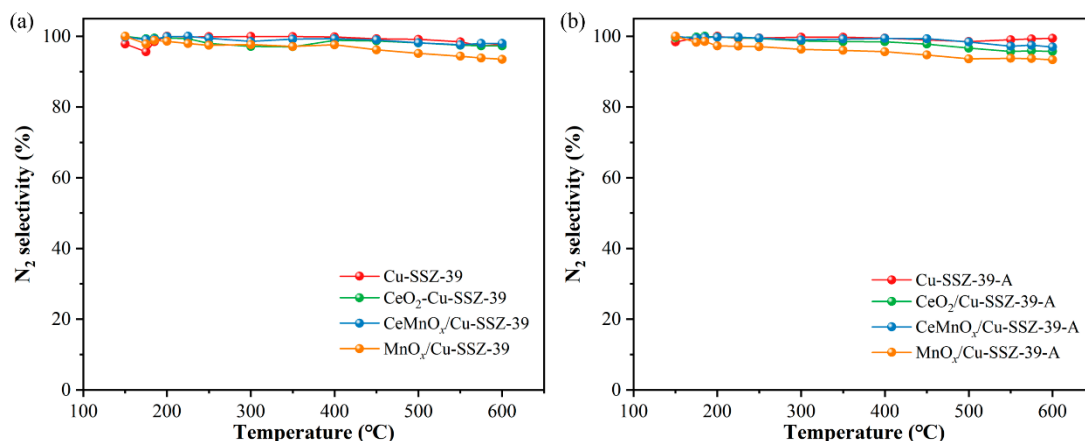

**Figure S3.**  $N_2$  selectivity of Cu-SSZ-39,  $CeO_2$ /Cu-SSZ-39,  $CeMnO_x$ /Cu-SSZ-39, and  $MnO_x$ /Cu-SSZ-39 catalysts: (a) fresh samples and (b) hydrothermal aged samples.

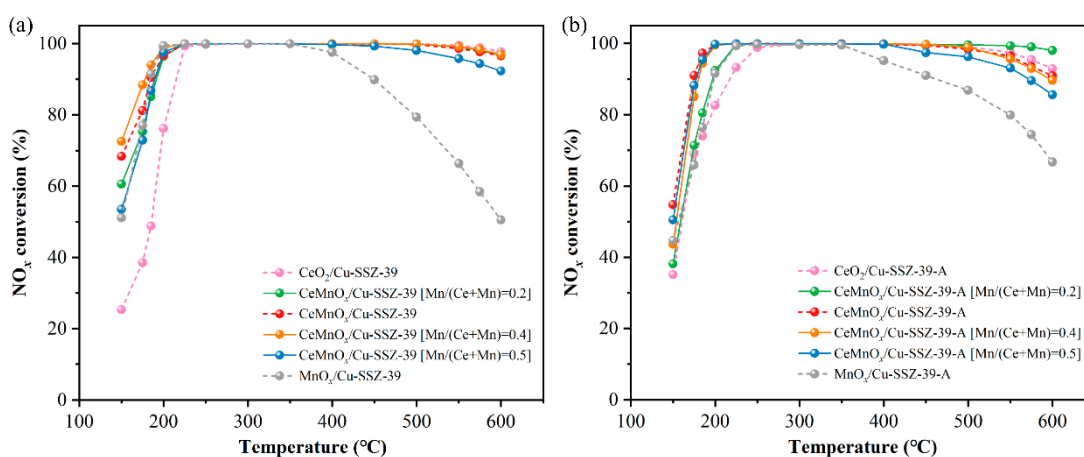

**Figure S4.**  $NO_x$  conversion of  $CeO_2$ /Cu-SSZ-39,  $CeMnO_x$ /Cu-SSZ-39 [ $Mn/(Ce + Mn) = 0.2$ ],  $CeMnO_x$ /Cu-SSZ-39 [ $Mn/(Ce + Mn) = 0.4$ ],  $CeMnO_x$ /Cu-SSZ-39 [ $Mn/(Ce + Mn) = 0.5$ ], and  $MnO_x$ /Cu-SSZ-39 catalysts: (a) fresh samples and (b) hydrothermally aged samples.

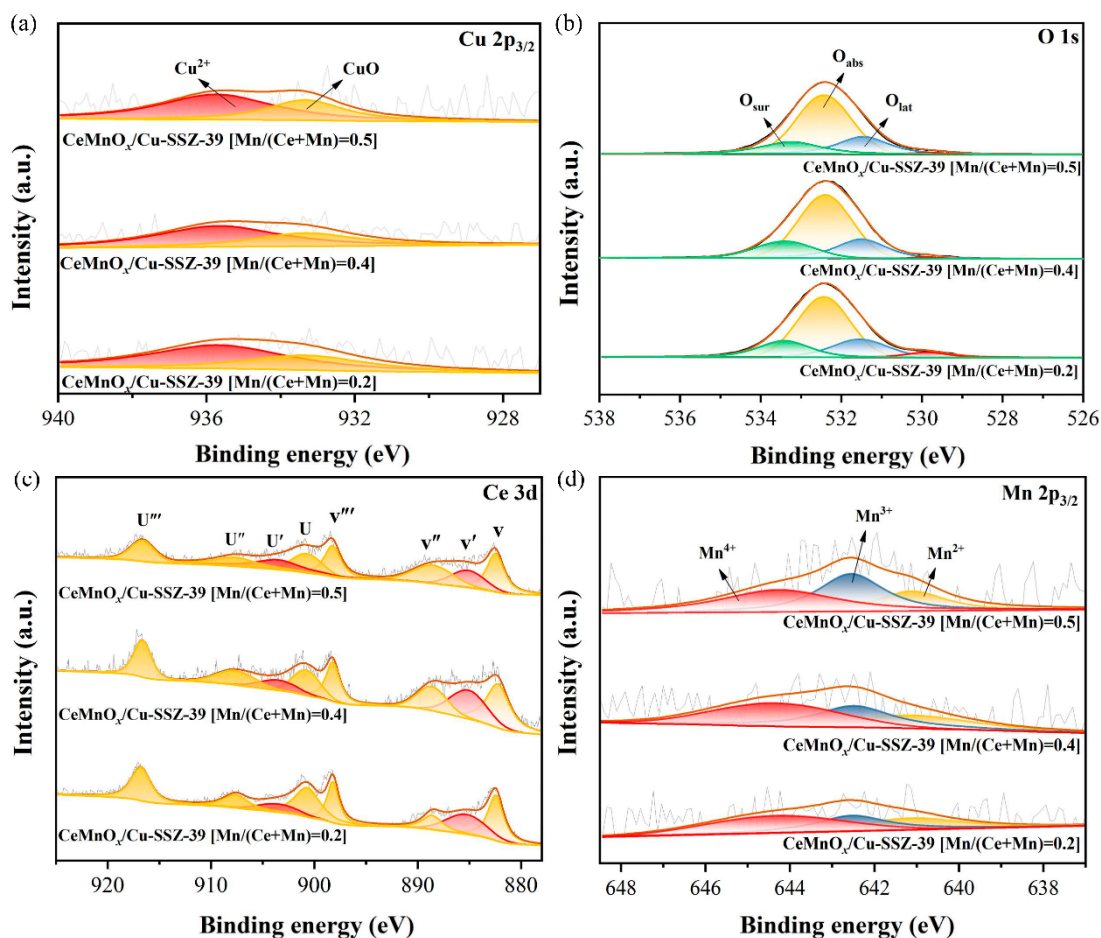

**Figure S5.** XPS spectra of Cu 2p<sub>3/2</sub> (a) (gray line was assigned to the original data, dark yellow line was assigned to the fitting curve); O 1s (b) (black line was assigned to the original data, dark yellow line was assigned to the fitting curve); Ce 3d (c) (gray line was assigned to the original data, dark yellow line was assigned to the fitting curve); and Mn 2p<sub>3/2</sub> (d) (gray line was assigned to the original data, dark yellow line was assigned to the fitting curve) of CeMnO<sub>x</sub>/Cu-SSZ-39 [Mn/(Ce + Mn) = 0.2], CeMnO<sub>x</sub>/Cu-SSZ-39 [Mn/(Ce + Mn) = 0.4], and CeMnO<sub>x</sub>/Cu-SSZ-39 [Mn/(Ce + Mn) = 0.5] catalysts.

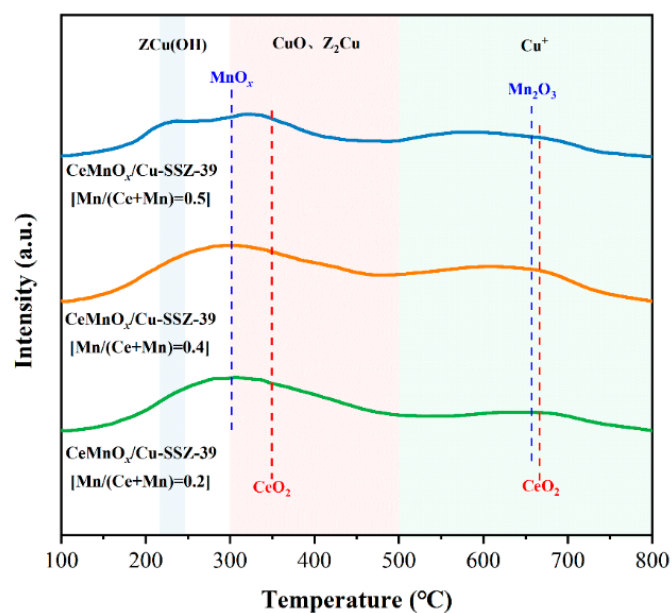

**Figure S6.** H<sub>2</sub>-TPR profiles of CeMnO<sub>x</sub>/Cu-SSZ-39 [Mn/(Ce + Mn) = 0.2], CeMnO<sub>x</sub>/Cu-SSZ-39 [Mn/(Ce + Mn) = 0.4], and CeMnO<sub>x</sub>/Cu-SSZ-39 [Mn/(Ce + Mn) = 0.5] catalysts.

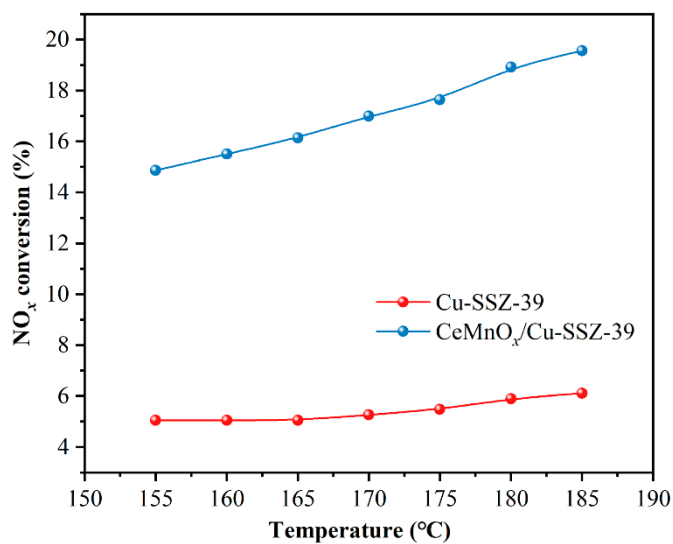

**Figure S7.** Kinetic catalytic performances of Cu-SSZ-39 and CeMnO<sub>x</sub>/Cu-SSZ-39 catalysts.

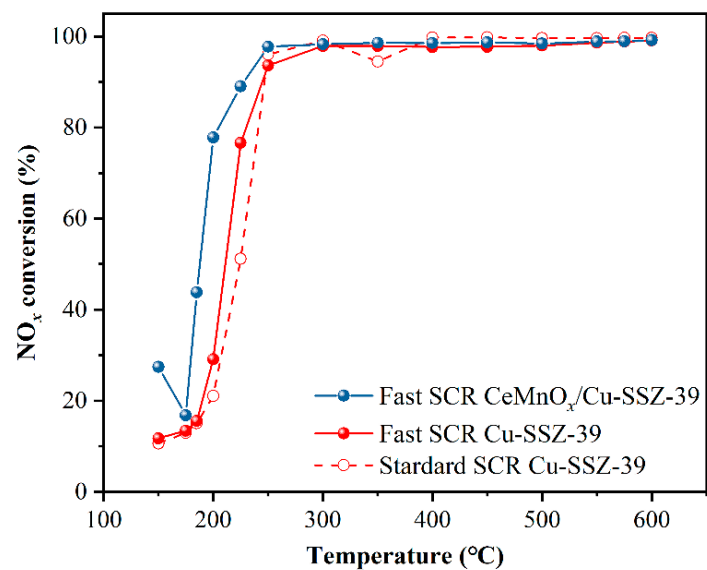

**Figure S8.** NO<sub>x</sub> conversion under fast SCR condition in Cu-SSZ-39 and CeMnO<sub>x</sub>/Cu-SSZ-39 catalysts.

**Table S1.** Cu 2p<sub>3/2</sub>, O 1s, Ce 3d, and Mn 2p<sub>3/2</sub> XPS analysis of the catalysts.

| Sample                                             | Cu (%)           |      | O (%)            |                  |                  | Ce (%)           |                  | Mn (%)           |                  |                  |
|----------------------------------------------------|------------------|------|------------------|------------------|------------------|------------------|------------------|------------------|------------------|------------------|
|                                                    | Cu <sup>2+</sup> | CuO  | O <sub>sur</sub> | O <sub>ads</sub> | O <sub>lat</sub> | Ce <sup>3+</sup> | Ce <sup>4+</sup> | Mn <sup>2+</sup> | Mn <sup>3+</sup> | Mn <sup>4+</sup> |
| CeMnO <sub>x</sub> /Cu-SSZ-39 [Mn/(Ce + Mn) = 0.2] | 64.8             | 35.2 | 19.1             | 59.1             | 21.7             | 20.0             | 80.0             | 28.1             | 29.9             | 42.0             |
| CeMnO <sub>x</sub> /Cu-SSZ-39 [Mn/(Ce + Mn) = 0.4] | 65.2             | 34.8 | 18.5             | 59.3             | 22.1             | 22.3             | 77.7             | 27.8             | 32.7             | 39.5             |
| CeMnO <sub>x</sub> /Cu-SSZ-39 [Mn/(Ce + Mn) = 0.5] | 64.7             | 35.3 | 18.8             | 59.1             | 22.1             | 22.7             | 77.3             | 25.3             | 36.7             | 38.0             |
